# Supplementary material for: A polyaniline functionalized NiFeP nanosheet array-based electrochemical immunosensor using Au/Cu2O nanocubes as a signal amplifier for the detection of SARS-CoV-2 nucleocapsid protein
Source: Royal Society of Chemistry journal article supplement (doi:10.1039/d3an00616f), 2023-01-01
Supplement: d3an00616f1.pdf [file d3an00616f1.pdf]

## Electronic Supplementary Information

### A polyaniline functionalized NiFeP nanosheet array-based electrochemical immunosensor via Au/Cu<sub>2</sub>O nanocube as a signal amplifier for the detection of SARS-CoV-2 nucleocapsid protein

Liwei Bai <sup>a</sup>, Yufen Shi <sup>a</sup>, Xue Zhang <sup>a</sup>, Xiaowei Cao <sup>c</sup>, Jianhua Jia <sup>d</sup>, Huanhuan Shi <sup>b\*</sup>,  
Wenbo Lu <sup>a\*</sup>

<sup>a</sup> *Key Laboratory of Magnetic Molecules and Magnetic Information Materials (Ministry of Education), School of Chemistry and Material Science, Shanxi Normal University, Taiyuan 030031, China*

<sup>b</sup> *Institut für Quanten Materialien und Technologien, Karlsruher Institut für Technologie, Hermann-v.-Helmholtz-Platz 1, 76344, Eggenstein-Leopoldshafen, Germany*

<sup>c</sup> *Institute of Translational Medicine, Medical College, Yangzhou University, Yangzhou 225001, China*

<sup>d</sup> *College of Basic Medical Sciences, Chongqing Medical University, Chongqing 400016, China*

**\*Corresponding author:**

E-mail: [huanhuan.shi@kit.edu](mailto:huanhuan.shi@kit.edu); [luwb@sxnu.edu.cn](mailto:luwb@sxnu.edu.cn)

## Experimental reagents

Ni Foam (NF) is purchased from Shenzhen Green and Creative Environmental Science and Technology Co. Ltd. (Shenzhen, China). Hydrochloric acid (HCl), sulfuric acid (H<sub>2</sub>SO<sub>4</sub>) and acetone are supplied by Luoyang Chemical Reagent Factory (Luoyang, China). Iron chloride (FeCl<sub>3</sub>), benzenedicarboxylic acid (BDC), cupric chloride dihydrate (CuCl<sub>2</sub>·2H<sub>2</sub>O), ascorbic acid (AA), gold chloride (HAuCl<sub>4</sub>), potassium ferricyanide (K<sub>3</sub>[Fe(CN)<sub>6</sub>]), potassium ferrocyanide (K<sub>4</sub>Fe(CN)<sub>6</sub>), potassium chloride (KCl) and aniline are purchased from Aladdin Co., Ltd. (Shanghai, China). Ethanol absolute (C<sub>2</sub>H<sub>5</sub>OH), N,N-dimethylformamide (DMF) are provide by Tianjin Kaitong Chemical Reagent Co., Ltd. (Tianjin, China). Disodium hydrogen phosphate dodecahydrate (Na<sub>2</sub>HPO<sub>4</sub>) and sodium dihydrogen phosphate dihydrate (NaH<sub>2</sub>PO<sub>4</sub>) are provided by Kemiou Chemical Reagent Co., Ltd. (Tianjin, China). Sodium hypophosphite (NaH<sub>2</sub>PO<sub>2</sub>) is obtained from Guangfu Fine Chemical Research Institute (Tianjin, China). Sodium hydroxide (NaOH) is provided by Tianjin Damao Chemical Reagent Factory. (Tianjin, China). Sodium citrate is bought from Tianjin Guangfu Technology Development Co., Ltd. (Tianjin, China). Glutaraldehyde is provided by Adamas Reagent Co., Ltd. (Shanghai, China). SARS-CoV-2 nucleocapsid protein (SARS-CoV-2 NP), Anti-SARS-CoV-2 NP McAb (coating, namely Ab<sub>1</sub>) and Anti-SARS-CoV-2 NP McAb (labeling, namely Ab<sub>2</sub>) are purchased by Shanghai Linc-bio Science Co. Ltd. (Shanghai, China). All experimental water is ultrapure water. All reagents in experiments are analytically pure without further purification before used.

## Experimental apparatus

Ultrapure water is purified through a system of laboratory water purification Eco-S15 (Hitech Instruments Co. Ltd, China). Powder X-ray diffraction (XRD) measurement is performed by an Ultima IV-185 diffractometer. Scanning electron microscopy (SEM) measurements are achieved through JSM-7500F scanning electron microscopy with an accelerating voltage of 20 kV. Transmission electron microscope

(TEM) is performed with JEM-2100. X-ray photoelectron spectroscopy (XPS) measurements are carried out on a K-Alpha X-ray photoelectron spectrometer. The Fourier transform infrared spectroscopy (FTIR) is completed by HW-10 of Beijing Puxi General Instrument Company.

### **Pretreatment of human serum samples**

Human blood samples are provided by the Linfen People's Hospital (Binghe West Road, Yaodu District, Linfen, Shanxi, China). Firstly, human whole blood samples were placed in a clean centrifuge tube. After standing for 1 h, the samples were centrifuged at 4000 rpm·min<sup>-1</sup> for 10 min. Finally, the serum supernatant was transferred to a volumetric flask and stored at 4 °C for further analysis.

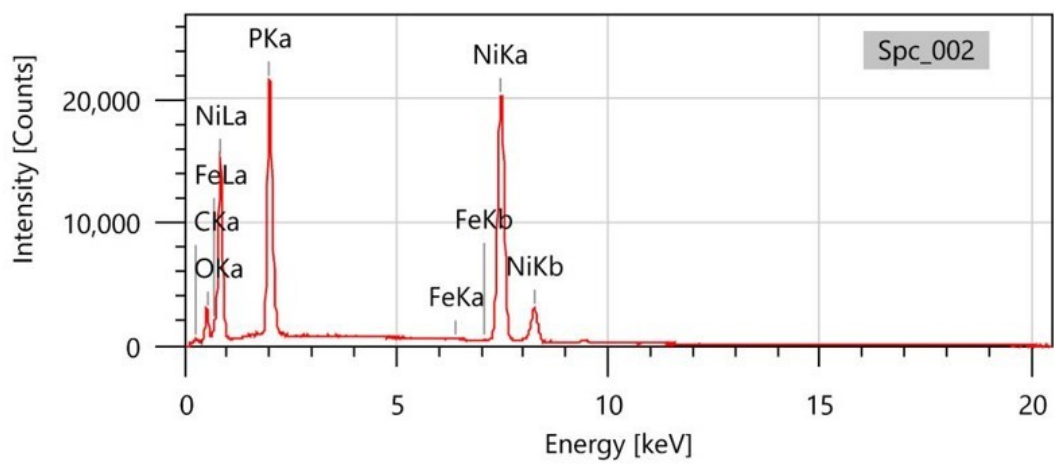

**Fig. S1.** The EDX image of the NiFeP nanosheet arrays.

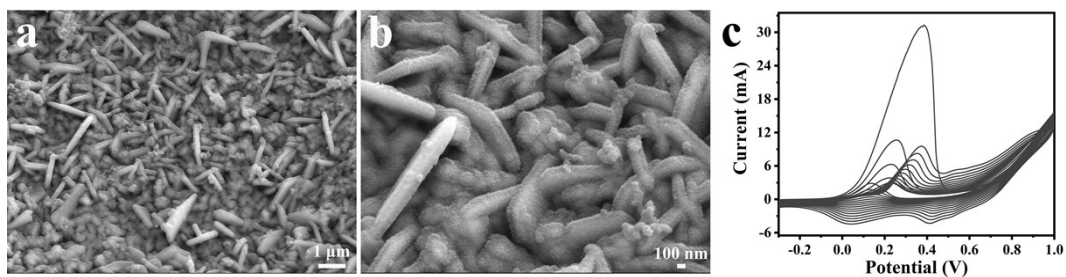

**Fig. S2.** (a, b) The SEM patterns of the PANI functionalized NiFeP nanosheet arrays with different magnifications. (c) The cyclic voltammetry (CV) curves of electro-polymerization of PANI for 15 cycles in the electrolyte solution of 0.5 M H<sub>2</sub>SO<sub>4</sub> containing 0.2 M aniline.

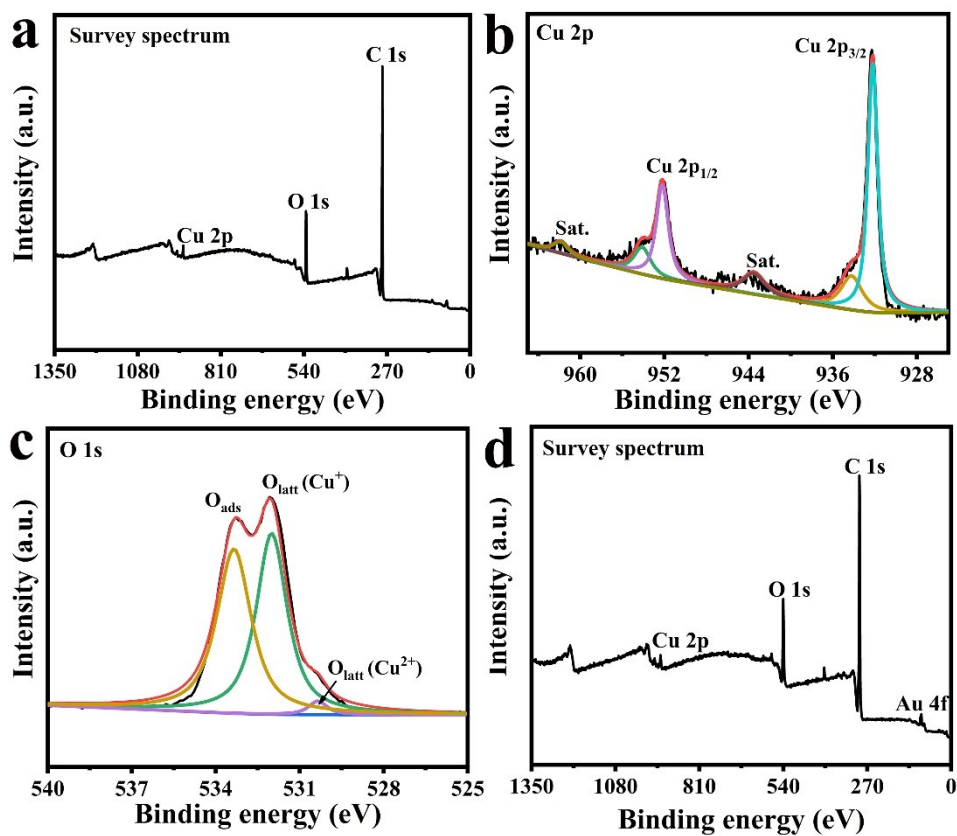

**Fig. S3.** (a) The XPS survey spectrum of the prepared Cu<sub>2</sub>O nanocubes. The XPS spectra of Cu 2p (b) and O 1s (c) of Cu<sub>2</sub>O nanocubes. (d) The XPS survey spectrum of the prepared Au/Cu<sub>2</sub>O nanocomposite.

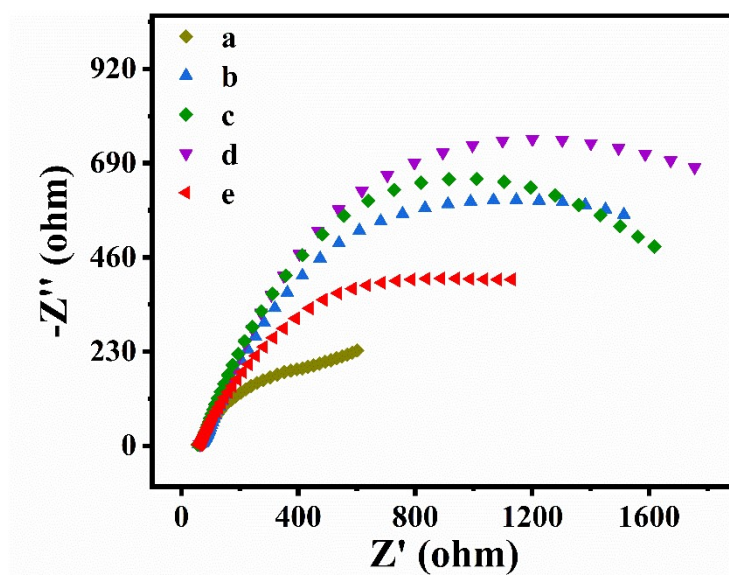

**Fig. S4.** Nyquist plots for fabrication steps of the immunosensor incubated with  $1.0 \text{ ng}\cdot\text{mL}^{-1}$  SARS-CoV-2 NP in  $0.1 \text{ mol}\cdot\text{L}^{-1}$  KCl solution containing  $5 \text{ mmol}\cdot\text{L}^{-1}$   $\text{Fe}(\text{CN})_6^{3-/4-}$ : (a) PANI/NiFeP/NF; (b)  $\text{Ab}_1$ /PANI/NiFeP/NF; (c) BSA/ $\text{Ab}_1$ /PANI/NiFeP/NF; (d) SARS-CoV-2 NP/BSA/ $\text{Ab}_1$ /PANI/NiFeP/NF; (e)  $\text{Ab}_2$ -Au/ $\text{Cu}_2\text{O}$ /SARS-CoV-2 NP/BSA/ $\text{Ab}_1$ /PANI/NiFeP/NF.

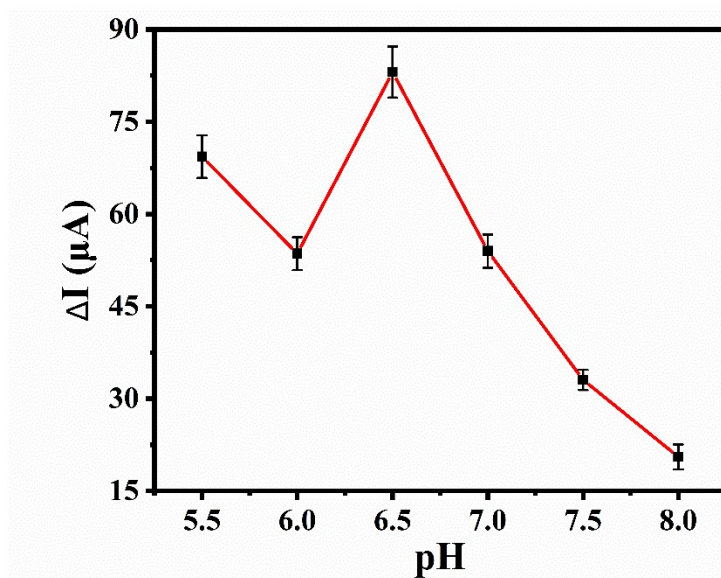

**Fig. S5.** Effect of various pH on the current change of the immunosensor incubated with  $1.0 \text{ ng}\cdot\text{mL}^{-1}$  SARS-CoV-2 NP in PBS solution after injecting  $5 \text{ mmol}\cdot\text{L}^{-1} \text{ H}_2\text{O}_2$ .



**Table S1.** Performance comparison of different immunosensors for the detection of SARS-CoV-2.

| Electrode                                                            | Target    | Linear range                                     | Detection limit          | Ref.      |
|----------------------------------------------------------------------|-----------|--------------------------------------------------|--------------------------|-----------|
| CNF/SPE                                                              | N protein | 0.1 pg·mL <sup>-1</sup> ~ 1 µg·mL <sup>-1</sup>  | 0.8 pg·mL <sup>-1</sup>  | 1         |
| Polycarbonate track-etched membrane                                  | N protein | 7.8 pg·mL <sup>-1</sup> ~ 1 ng·mL <sup>-1</sup>  | 7.5 pg·mL <sup>-1</sup>  | 2         |
| Bi <sub>2</sub> WO <sub>6</sub> /Bi <sub>2</sub> S <sub>3</sub> /GCE | N protein | 0.01 ~ 1.00 pg·mL <sup>-1</sup>                  | 3.00 fg·mL <sup>-1</sup> | 3         |
| TDBA-β-CD-Pt                                                         | N protein | 50 fg·mL <sup>-1</sup> ~ 1.0 ng·mL <sup>-1</sup> | 22 fg·mL <sup>-1</sup>   | 4         |
| ToAD                                                                 | N protein | 0.1 ~ 10 ng·mL <sup>-1</sup>                     | 0.1 ng·mL <sup>-1</sup>  | 5         |
| TiO <sub>2</sub> @Bi <sub>2</sub> WO <sub>6</sub> /Ag <sub>2</sub> S | N protein | 1 pg·mL <sup>-1</sup> ~ 50 ng·mL <sup>-1</sup>   | 0.38 pg·mL <sup>-1</sup> | 6         |
| DMSN@QDs                                                             | N protein | 5 µg·mL <sup>-1</sup> ~ 50 ng·mL <sup>-1</sup>   | 3.33 pg·mL <sup>-1</sup> | 7         |
| Ir NPs                                                               | N protein | 100 fg·mL <sup>-1</sup> ~ 10 ng·mL <sup>-1</sup> | 47 fg·mL <sup>-1</sup>   | 8         |
| PANI/NiFeP/NF                                                        | N protein | 10 fg·mL <sup>-1</sup> ~ 20 ng·mL <sup>-1</sup>  | 1.12 fg·mL <sup>-1</sup> | This work |

**Table S2.** The recovery tests of SARS-CoV-2 NP in actual human serum samples by standard addition method using the constructed immunosensor.

| Sample | Added (pg·mL <sup>-1</sup> ) | Found (pg·mL <sup>-1</sup> ) | Recovery (%) | RSD (%)<br>(n = 3) |
|--------|------------------------------|------------------------------|--------------|--------------------|
| 1      | 50                           | 46.002                       | 92.00        | 7.60               |
|        |                              | 48.733                       | 97.45        |                    |
|        |                              | 53.424                       | 106.85       |                    |
| 2      | 150                          | 147.086                      | 98.06        | 3.87               |
|        |                              | 158.937                      | 105.96       |                    |
|        |                              | 153.587                      | 102.39       |                    |

## References

- 1 S. Eissa, M. Zourob, *Anal. Chem.*, 2021, **93**, 1826-1833.
- 2 Z. Wu, C. Wang, B. Liu, C. Liang, J. Lu, J. Li, X. Tang, C. Li, T. Li, *ACS Sens.*, 2022, **7**, 1985-1995.
- 3 C. Karaman, B. B. Yola, O. Karaman, N. Atar, I. Polat, M. L. Yola, *Mikrochim. Acta*, 2021, **188**, 425.
- 4 Y. Chen, Y. He, J. Zhao, J. Zhang, R. Yuan, S. Chen, *Anal. Chem.*, 2022, **94**, 4446-4454.
- 5 H. Cho, S. Shim, W. W. Cho, S. Cho, H. Baek, S. M. Lee, D. S. Shin, *ACS Sens.*, 2022, **7**, 1676-1684.
- 6 H. Chang, M. Jiang, Q. Zhu, A. Liu, Y. Wu, C. Li, X. Ji, L. Gong, S. Li, Z. Chen, L. Kong, L. Han, *Microchem. J.*, 2022, **182**, 107866.
- 7 S. Feng, F. Pei, W. Hu, Z. Liu, B. Du, X. Mu, B. Liu, Q. Hao, W. Lei, Z. Tong, *New J. Chem.*, 2023, <https://doi.org/10.1039/D3NJ01641B>
- 8 Y. Wen, G. Yang, J. Zhao, Y. He, R. Yuan, S. Chen, *Sens. Actuators B Chem.*, 2022, **371**, 132602.
